# Supplementary material
Source: Springer Nature journal article supplement (https://www.springermedizin.de/resource/supplementary/13058_2011_2971_MOESM9_ESM.pdf/9702956)

**A**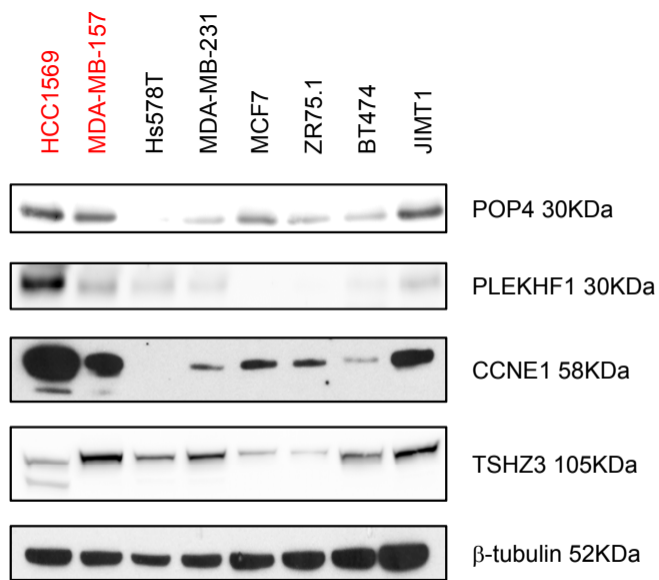**B**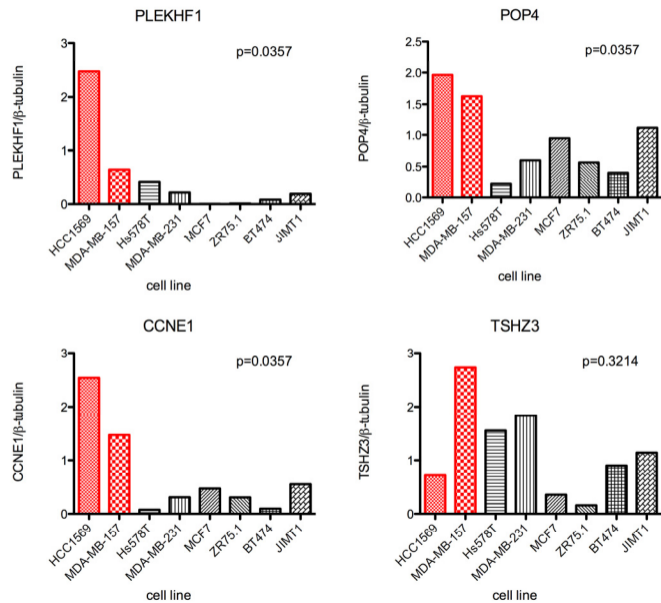

Supplement: MOESM9 [file 9702956]
